# Supplementary material for: Polymorphisms of the MxA and MxB genes are associated with biochemical indices and viral subtypes in Yunnan HCV patients
Source: Front Cell Infect Microbiol. 2023 Jan 19;13:1119805. doi: 10.3389/fcimb.2023.1119805 (PMC9892934; doi:10.3389/fcimb.2023.1119805)
Supplement: Supplementary file 1 [file Table_1.xlsx]

## Sheet: Sheet1
Supplementary table 1. The genotyping result of each HCV patient.
Sample	Rs11322783(IFNL4)	Rs117648444(IFNL4)	rs17000900(MxA)	rs2071430(MxA)	rs9982944(MxB)	rs408825(MxB)	rs2838029(MxB)
KH3	TT	GG	AC	GT	AG	TT	GG
KH4	TT	GG	CC	GG	GG	TT	GG
KH5	TT	GG	AC	GT	AG	TT	GG
KH6	TT	GG	CC	GG	GG	TT	GG
KH7	TT	GG	CC	GG	GG	CT	GG
KH8	TT	GG	CC	GG	GG	TT	GG
KH9	TT	GG	AC	GT	AG	CT	AG
KH10	TT	GG	CC	GT	AG	CT	GG
KH11	TT	GG	CC	GT	AG	TT	GG
KH14	TT	GG	AC	GT	AG	TT	GG
KH15	TT	GG	CC	GG	GG	TT	GG
KH16	TT	GG	CC	GG	GG	CT	GG
KH17	TT	GG	CC	TT	AA	TT	GG
KH18	TT	GG	AC	GT	AG	CT	AG
KH19	TT	GG	CC	GT	AG	TT	GG
KH24	TT	GG	AA	TT	AA	CC	GG
KH25	TT	AG	CC	GG	GG	TT	GG
KH26	TT	GG	CC	GT	AG	CT	AG
KH27	TT	GG	CC	GG	GG	TT	GG
KH28	TT	GG	CC	GG	GG	CT	AG
KH29	TT	GG	CC	GT	AA	TT	GG
KH30	TT	GG	CC	GG	GG	TT	GG
KH32	TT	GG	CC	GG	AA	CC	GG
KH36	TT	GG	AA	TT	AA	TT	GG
KH37	TT	GG	CC	GT	AG	TT	GG
KH38	TT	GG	CC	TT	AA	TT	GG
KH39	TT	GG	CC	GT	AG	TT	GG
KH40	TT	GG	CC	GG	AG	TT	GG
KH42	TT	GG	AC	GT	AG	CT	AG
KH43	TT	GG	CC	GG	AG	TT	GG
KH44	TT	GG	CC	GG	GG	CT	GG
KH45	TT	GG	CC	GG	GG	TT	GG
KH46	TT	GG	AC	GT	GG	TT	GG
KH49	TT	GG	CC	GT	AG	TT	GG
KH50	TT	GG	AC	GT	AG	TT	GG
KH52	TT	GG	CC	GG	GG	TT	AG
KH53	TT	GG	AC	GT	AG	TT	GG
KH54	TT	GG	CC	GT	GG	CT	AG
KH55	TT	GG	CC	GG	AG	TT	GG
KH56	TT	GG	CC	GT	GG	TT	GG
KH62	TT	GG	AC	GT	AG	CT	GG
KH63	TT	GG	AC	GT	AG	TT	GG
KH64	TT	GG	CC	GT	AG	CT	AG
KH65	TT	GG	AC	GT	AG	TT	GG
KH66	TT	GG	AC	GT	AG	TT	GG
KH67	TT	GG	CC	GG	GG	TT	GG
KH68	TT	GG	CC	GG	AG	TT	GG
KH70	TT	GG	CC	GG	GG	TT	GG
KH71	TT	GG	AC	GT	GG	TT	GG
KH73	TT	GG	AC	TT	GG	TT	GG
KH75	TT	GG	CC	GG	GG	TT	GG
KH77	TT	GG	AC	TT	AA	TT	GG
KH78	TT	GG	AC	TT	AA	TT	GG
KH81	TT	GG	AC	TT	AA	TT	GG
KH82	TT	GG	AC	GT	GG	TT	GG
KH83	TT	GG	CC	GG	GG	CT	AG
KH84	TT	GG	CC	TT	AG	CT	GG
KH86	TT	GG	CC	GG	GG	TT	GG
KH87	TT	GG	CC	GT	AG	CC	AG
KH88	TT	GG	CC	GT	AG	TT	GG
KH89	TT	GG	AC	GT	AG	TT	GG
KH91	TT	GG	CC	GG	AG	CT	GG
KH92	TT	GG	CC	GG	GG	CT	GG
KH93	TT	GG	AC	GT	AG	TT	GG
KH95	TT	GG	CC	TT	AA	CT	GG
KH96	TT	GG	CC	GG	AG	TT	GG
KH97	TT	GG	CC	GT	AG	CT	GG
KH98	TT	GG	AC	GT	AG	CT	GG
KH99	TT	GG	AC	GT	AG	CT	GG
KH100	TT	GG	CC	GG	AG	TT	GG
KH102	TT	GG	AC	GT	GG	CT	AG
KH103	TT	GG	CC	GT	AG	CT	GG
KH104	TT	GG	AA	TT	AA	TT	GG
KH105	TT	GG	CC	GT	AG	TT	GG
KH106	TT	GG	AA	TT	AA	TT	GG
KH109	TT	GG	CC	GG	AG	CT	AG
KH110	TT	GG	CC	GG	AG	TT	GG
KH112	TT	GG	CC	GG	GG	TT	GG
KH113	TT	GG	CC	GG	GG	TT	GG
KH114	TT	GG	CC	GG	AG	CC	AG
KH116	TT	GG	CC	GG	GG	CT	GG
KH117	TT	GG	CC	GT	GG	TT	GG
KH118	TT	GG	CC	TT	AG	TT	GG
KH120	TT	GG	AC	GT	AA	CT	GG
KH121	TT	GG	CC	GT	GG	CC	GG
KH123	TT	GG	AC	TT	AG	CT	GG
KH126	TT	GG	CC	GG	GG	TT	GG
KH128	TT	GG	CC	GT	GG	TT	GG
KH130	TT	GG	CC	GG	GG	CT	AG
KH135	TT	GG	CC	GG	GG	TT	GG
KH137	TT	GG	AC	TT	AG	TT	GG
KH138	TT	GG	CC	GG	AG	TT	GG
KH139	TT	GG	AC	GT	AG	TT	AG
KH141	TT	GG	CC	GT	AG	CT	GG
KH143	TT	GG	AC	GT	AG	CT	GG
KH144	TT	GG	CC	GG	GG	CT	GG
KH145	TT	GG	CC	GT	AG	CT	AG
KH147	TT	GG	CC	GT	AG	CT	GG
KH151	TT	GG	CC	GG	AG	TT	GG
KH152	TT	GG	CC	GT	AA	TT	GG
KH154	TT	GG	CC	GG	GG	TT	GG
KH157	TT	GG	AC	GT	AG	CT	AG
KH158	- -	GG	CC	GG	AG	TT	GG
KH159	TT	GG	CC	GG	GG	CT	AG
KH160	TT	GG	CC	GG	AG	TT	GG
KH161	TT	GG	CC	GG	GG	TT	GG
KH165	TT	GG	CC	GG	AG	TT	GG
KH166	TT	GG	CC	GT	AG	CT	GG
KH167	TT	GG	CC	GG	AG	TT	GG
KH168	TT	GG	AC	GT	AG	TT	GG
KH171	TT	GG	AC	GT	AG	TT	GG
KH172	TT	GG	CC	GT	GG	CT	GG
KH173	TT	GG	AC	TT	AA	CT	GG
KH175	TT	GG	CC	GT	GG	TT	GG
KH176	TT	GG	CC	GG	AG	CT	AG
KH182	TT	GG	AC	GT	AG	CT	AG
KH183	TT	GG	CC	TT	AG	TT	GG
KH191	TT	GG	CC	GG	GG	CT	GG
KH192	TT	GG	CC	GG	GG	TT	GG
KH194	TT	AG	CC	GT	AG	TT	GG
KH195	TT	GG	CC	GG	GG	CT	GG
KH197	TT	GG	CC	GT	GG	CT	GG
KH198	TT	GG	CC	GG	AG	TT	GG
KH200	TT	GG	CC	GG	GG	TT	GG
KH202	TT	GG	CC	GG	GG	CT	GG
KH203	TT	GG	CC	TT	AG	TT	GG
KH204	TT	GG	CC	TT	AG	TT	GG
KH206	TT	GG	CC	GG	GG	CT	GG
KH207	TT	GG	CC	GG	AG	CT	GG
KH208	- -	AG	CC	GG	AG	TT	GG
KH210	TT	GG	CC	GG	AG	TT	GG
KH211	TT	AG	AC	GT	AG	CT	AG
KH213	TT	GG	AC	TT	AA	TT	GG
KH214	TT	GG	CC	GG	AG	TT	GG
KH216	TT	GG	AC	GT	AG	CT	GG
KH217	TT	GG	CC	GG	GG	TT	GG
KH218	TT	GG	CC	GG	AG	CT	GG
KH219	TT	GG	CC	GG	AG	TT	GG
KH220	TT	GG	CC	GG	GG	TT	GG
KH221	TT	GG	CC	GG	GG	CT	GG
KH222	TT	GG	CC	GT	AG	CT	GG
KH223	TT	GG	AC	GT	AG	CT	AG
KH224	TT	GG	CC	GG	AG	TT	GG
KH226	TT	GG	CC	GT	AG	CT	AG
KH230	TT	GG	CC	GT	AA	CT	GG
KH232	TT	GG	CC	GG	GG	TT	GG
KH233	TT	GG	CC	GG	GG	CT	AG
KH236	TT	GG	CC	GT	AG	TT	GG
KH237	TT	GG	CC	GT	GG	CT	AG
KH239	TT	GG	AC	GT	AG	TT	GG
KH240	TT	GG	CC	GG	AG	CT	GG
KH241	TT	GG	CC	GG	GG	TT	GG
KH244	TT	GG	AC	GT	GG	TT	GG
KH245	TT	GG	CC	GG	GG	TT	GG
KH246	TT	GG	CC	GG	GG	TT	GG
KH248	TT	GG	CC	GT	AG	TT	GG
K1	TT	GG	CC	GG	AG	CT	AG
K2	TT	GG	CC	GG	GG	CT	AG
K3	TT	GG	CC	GT	AG	TT	GG
K4	TT	GG	AC	GT	AG	TT	GG
K5	TT	GG	CC	GG	GG	CT	GG
K6	TT	GG	CC	GG	GG	CT	GG
K7	TT	GG	AC	GT	GG	CT	GG
K8	TT	GG	AC	GT	GG	TT	GG
K9	TT	GG	AC	GT	GG	TT	GG
K10	TT	GG	CC	GG	GG	CT	GG
K11	TT	GG	AC	GT	GG	TT	GG
K12	TT	GG	CC	GT	GG	CT	AG
K13	TT	GG	CC	GG	GG	TT	GG
K14	TT	GG	AC	GT	AG	TT	GG
K15	TT	GG	CC	GG	GG	TT	GG
K17	TT	GG	CC	GG	GG	CT	AG
K18	TT	GG	CC	GG	GG	TT	GG
K20	TT	GG	AC	GT	AG	CC	AA
K21	TT	GG	CC	TT	AA	TT	GG
K22	TT	GG	AC	GT	GG	TT	GG
K23	TT	GG	AC	GT	GG	TT	GG
K24	TT	GG	CC	GG	GG	CT	GG
K25	TT	GG	CC	GT	AG	TT	GG
K26	TT	GG	AC	GT	AG	CT	GG
K27	TT	GG	CC	GT	AG	CT	GG
K28	TT	GG	CC	GT	AG	TT	GG
K29	TT	GG	CC	GT	AG	TT	GG
K30	TT	GG	AC	GT	AG	CT	AG
K31	TT	GG	CC	GG	GG	TT	GG
K32	TT	GG	CC	GT	AG	CT	GG
K34	TT	GG	CC	GG	GG	TT	GG
K35	TT	GG	AC	GT	AG	TT	GG
K36	TT	GG	CC	GG	GG	CT	AG
K37	TT	GG	AC	GT	AG	TT	GG
K38	TT	GG	CC	GT	AA	TT	GG
K39	TT	GG	CC	GT	GG	CT	GG
K40	TT	GG	CC	GT	AG	TT	GG
K41	TT	GG	CC	GG	GG	CT	AG
K42	TT	GG	AC	GT	AG	CT	AG
K43	TT	GG	CC	GG	GG	TT	GG
K44	TT	GG	CC	GG	GG	CT	GG
K45	TT	GG	CC	GT	AG	TT	GG
K46	TT	GG	CC	GG	GG	TT	GG
K47	TT	GG	CC	GT	AG	CT	GG
K48	TT	GG	AC	GT	AA	CT	GG
K49	TT	GG	CC	GG	GG	TT	GG
K50	TT	GG	CC	GG	GG	TT	GG
K51	TT	GG	AC	GT	AG	TT	GG
K52	TT	GG	CC	GG	GG	TT	GG
K53	TT	GG	AC	GT	AG	CT	GG
K54	TT	GG	CC	GT	AG	TT	GG
K55	TT	GG	CC	GT	AG	TT	GG
K56	TT	GG	CC	GG	GG	TT	GG
K57	TT	GG	CC	GG	GG	CT	AG
K58	TT	GG	AC	GT	GG	TT	GG
K59	TT	GG	CC	GT	AG	TT	GG
K60	TT	GG	AC	TT	AG	TT	GG
K61	TT	GG	CC	GG	GG	TT	GG
K62	TT	GG	CC	GT	AG	CT	AG
K63	TT	GG	CC	GG	GG	CT	AG
K64	TT	GG	AC	GT	GG	TT	GG
K65	TT	GG	CC	GT	GG	CT	GG
K66	TT	GG	AC	TT	AG	CT	GG
K67	TT	GG	CC	GG	GG	CT	GG
K68	TT	GG	CC	GG	GG	TT	GG
K69	TT	GG	CC	GG	GG	TT	GG
K70	TT	GG	AC	GT	AG	CT	AG
K71	TT	GG	CC	GT	AG	TT	GG
K72	TT	GG	CC	GT	AG	TT	GG
K73	TT	GG	CC	GG	GG	TT	GG
K74	TT	GG	CC	GG	GG	CC	GG
K75	TT	GG	CC	GT	AG	TT	GG
K76	TT	GG	CC	GG	GG	TT	GG
K77	TT	GG	CC	GG	AG	TT	GG
K78	TT	GG	CC	GG	GG	TT	GG
K79	TT	GG	CC	GT	AG	TT	GG
K80	TT	GG	AC	GT	AG	CT	GG
K81	TT	GG	CC	GG	GG	CT	AG
K82	TT	GG	CC	GT	GG	CT	GG
K83	TT	GG	AC	GT	AG	TT	GG
K84	TT	GG	CC	GG	GG	CT	GG
K85	TT	GG	CC	GT	AG	CT	AG
K86	TT	GG	CC	GG	GG	TT	GG
K87	TT	GG	CC	GG	GG	TT	GG
K88	TT	GG	AC	GT	AG	TT	GG
K89	TT	GG	AC	GT	GG	TT	GG
K90	TT	GG	CC	GG	GG	CT	AG
K91	TT	GG	CC	GG	AG	CT	GG
K92	TT	GG	AC	GT	AG	TT	GG
K93	TT	GG	CC	GG	GG	CT	GG
K94	TT	GG	AC	GT	AA	CT	GG
K95	TT	GG	CC	GT	AA	CT	GG
K96	TT	GG	AC	GT	AG	TT	GG
K97	TT	GG	CC	GT	AG	TT	GG
K98	TT	GG	CC	GG	AG	CT	GG
K99	TT	GG	CC	GG	GG	TT	GG
K100	TT	GG	CC	TT	AG	CT	GG
K101	TT	GG	AC	TT	AG	CT	GG
K102	TT	GG	CC	GG	GG	TT	GG
K105	TT	GG	CC	GG	AG	CT	GG
K106	TT	GG	CC	GT	AG	TT	GG
K107	TT	GG	CC	GG	GG	TT	GG
K108	TT	GG	CC	GG	GG	CC	AA
K109	TT	GG	CC	GG	GG	TT	GG
K110	TT	GG	CC	GG	GG	TT	GG
K111	TT	GG	CC	GG	AG	TT	GG
K112	TT	GG	CC	TT	AG	CT	GG
K113	TT	GG	AC	TT	AG	CT	GG
K114	TT	GG	CC	GG	AG	TT	GG
K115	TT	GG	CC	GG	GG	TT	GG
K116	TT	GG	AC	GT	AG	TT	GG
K117	TT	GG	CC	GG	GG	TT	GG
K118	TT	GG	CC	GT	GG	CT	GG
K119	TT	GG	CC	GG	GG	TT	GG
K120	TT	GG	AC	TT	AA	TT	AG
K121	TT	GG	CC	GT	GG	TT	GG
K122	TT	GG	CC	GG	GG	TT	GG
K123	TT	GG	CC	GT	GG	TT	GG
K124	TT	GG	CC	GG	AG	CC	GG
K125	TT	GG	AC	TT	AA	TT	GG
K126	TT	GG	CC	GG	AG	CC	GG
K127	TT	GG	CC	GT	AG	TT	GG
K128	TT	GG	CC	GT	GG	TT	GG
K129	TT	GG	CC	GG	GG	TT	GG
K130	TT	GG	CC	GG	GG	TT	GG
K131	TT	GG	CC	GG	GG	TT	GG
K132	TT	GG	CC	GG	GG	TT	GG
K133	TT	GG	CC	GG	AG	TT	GG
K134	TT	GG	CC	GT	GG	TT	GG
K135	TT	GG	CC	GG	GG	CT	GG
K136	TT	GG	CC	GG	GG	CT	AG
K137	TT	GG	CC	GG	GG	TT	GG
K138	TT	GG	CC	GG	GG	CC	GG
K139	TT	GG	CC	TT	AA	TT	GG
K140	TT	GG	CC	GG	GG	TT	GG
K141	TT	GG	CC	GG	GG	TT	GG
K142	TT	GG	CC	GG	AG	CT	AG
K143	TT	GG	CC	GG	GG	TT	GG
K144	TT	GG	CC	GG	GG	TT	GG
K145	TT	GG	CC	GG	GG	TT	GG
K146	TT	GG	CC	GT	AG	TT	GG
K147	TT	GG	AC	GT	AG	TT	GG
K148	TT	GG	CC	GT	AA	TT	GG
K149	TT	GG	CC	GG	GG	TT	GG
K150	TT	GG	AC	GT	AG	TT	GG
K151	TT	GG	CC	GG	GG	TT	GG
K152	TT	GG	CC	GG	GG	TT	GG
K153	TT	GG	AC	GT	GG	TT	GG
K154	TT	GG	CC	GG	GG	TT	GG
K155	TT	AG	CC	GG	GG	CT	GG
K156	TT	GG	AA	TT	GG	TT	GG
K157	TT	GG	CC	GG	GG	TT	GG
K158	TT	GG	CC	GG	GG	TT	GG
K159	TT	GG	CC	GG	GG	TT	GG
K160	TT	GG	CC	GG	GG	CT	GG
K161	TT	GG	CC	GT	GG	CT	GG
K162	TT	GG	AC	GT	AG	TT	GG
K163	TT	GG	AC	GT	AG	TT	GG
K164	TT	GG	AC	TT	AG	TT	GG
K165	TT	GG	CC	GT	AG	CT	GG
K166	TT	GG	CC	GG	GG	CT	AG
K167	TT	GG	AC	GT	GG	TT	GG
K168	TT	GG	CC	GG	GG	CT	AG
K169	TT	GG	CC	GG	GG	CT	GG
K170	TT	GG	AC	GT	AA	TT	GG
K171	TT	GG	AC	TT	AG	TT	GG
K172	TT	GG	AC	GT	AG	TT	GG
K173	TT	GG	AC	GT	AG	TT	GG
K174	TT	GG	CC	GG	GG	TT	GG
K175	TT	GG	CC	GG	AG	CT	AG
K176	TT	GG	AC	GT	AG	TT	GG
K177	TT	GG	AC	TT	AA	TT	GG
K178	TT	GG	CC	GG	GG	CT	AG
K179	TT	GG	AC	GT	GG	CT	GG
K180	TT	GG	CC	GT	AG	CT	AG
K181	TT	GG	CC	GT	AG	TT	GG
K182	TT	GG	CC	GG	AG	CT	AG
K183	TT	GG	CC	GT	AG	TT	GG
K184	TT	GG	AA	TT	AA	TT	GG
K185	TT	GG	CC	GG	GG	TT	GG
K186	TT	GG	CC	GG	GG	TT	GG
K187	TT	GG	CC	GG	AG	TT	GG
K188	TT	GG	AC	GT	AG	TT	GG
K189	TT	GG	CC	GG	GG	CT	AG
K190	TT	GG	CC	GT	AG	TT	GG
K191	TT	GG	CC	GG	AG	TT	GG
K192	TT	GG	CC	GT	GG	CT	AG
K193	TT	GG	AC	GT	AG	TT	GG
K194	TT	AG	CC	GG	GG	TT	GG
K195	TT	GG	AC	GT	AG	TT	GG
K196	TT	GG	CC	GT	AG	CT	GG
