# Supplementary material for: Polymorphisms of the MxA and MxB genes are associated with biochemical indices and viral subtypes in Yunnan HCV patients
Source: Front Cell Infect Microbiol. 2023 Jan 19;13:1119805. doi: 10.3389/fcimb.2023.1119805 (PMC9892934; doi:10.3389/fcimb.2023.1119805)
Supplement: Supplementary file 2 [file Table_2.xlsx]

## Sheet: Sheet1
Supplementary table 2.The genotyping results of each control sample.
Sample	Rs11322783(IFNL4)	Rs117648444(IFNL4)	rs2071430(MxA)	rs17000900(MxA)	rs9982944(Mx2)	rs408825(Mx2)	rs2838029(Mx2)
1	G T	A G	G G	C C	G G	T T	G G
3	T T	G G	G T	A C	A G	T T	G G
5	T T	G G	G G	C C	A G	T T	G G
6	T T	G G	G G	C C	A G	C T	G G
7	T T	G G	G G	C C	A G	T T	G G
8	T T	G G	T T	A A	G G	T T	G G
9	T T	G G	G G	C C	A G	T T	G G
10	T T	G G	G T	C C	A G	T T	G G
11	T T	G G	G G	C C	G G	C T	G G
12	T T	G G	G T	C C	A G	T T	G G
13	T T	G G	G T	A C	A A	T T	G G
14	T T	G G	G T	A C	A G	T T	G G
15	T T	G G	G T	C C	G G	T T	G G
16	T T	G G	G G	C C	G G	T T	G G
18	T T	A G	G T	C C	A A	C T	A G
20	T T	G G	G G	C C	A G	C T	G G
21	T T	G G	T T	A C	G G	T T	G G
22	T T	G G	G G	C C	G G	T T	G G
23	T T	G G	G T	A C	A G	C T	G G
24	T T	G G	G G	C C	A G	T T	G G
25	T T	G G	G T	C C	G G	C T	G G
26	T T	G G	G T	A C	G G	T T	G G
27	T T	G G	G T	A C	G G	T T	G G
29	T T	G G	T T	A C	A G	T T	G G
30	T T	G G	T T	A C	A G	T T	G G
33	T T	G G	G G	C C	G G	T T	G G
34	T T	G G	G T	C C	G G	C T	A G
35	T T	G G	G G	C C	A G	T T	G G
36	T T	G G	T T	A A	G G	T T	G G
37	T T	G G	G G	C C	G G	T T	G G
40	T T	G G	G T	A C	G G	T T	G G
41	T T	G G	G T	C C	A G	C T	G G
42	T T	G G	G G	C C	G G	T T	G G
43	T T	G G	G G	C C	A G	T T	G G
44	T T	G G	G G	C C	G G	C C	G G
45	T T	G G	G G	C C	A G	C C	G G
48	T T	G G	G G	C C	A G	T T	G G
49	T T	G G	G T	C C	G G	C T	G G
50	T T	G G	G G	C C	G G	T T	G G
51	T T	G G	G T	C C	A A	C T	G G
52	T T	G G	G G	C C	G G	C T	G G
54	T T	G G	G T	C C	A G	C T	A G
55	T T	G G	G G	C C	G G	T T	G G
56	T T	G G	G T	C C	A G	T T	G G
57	T T	G G	G T	C C	G G	C T	G G
58	T T	G G	G G	C C	A G	T T	G G
61	T T	G G	G T	C C	A G	T T	G G
63	T T	G G	G G	C C	A G	C T	G G
64	T T	G G	G T	C C	G G	T T	G G
66	T T	G G	G G	C C	G G	C T	G G
67	T T	G G	G T	A C	G G	T T	G G
68	T T	G G	T T	C C	G G	T T	G G
70	T T	G G	G T	A C	G G	T T	G G
71	T T	G G	G T	C C	G G	T T	G G
72	T T	G G	G T	C C	A G	T T	G G
73	G T	G G	G T	A C	A A	T T	G G
74	T T	G G	G G	C C	G G	C C	A A
75	T T	G G	G T	A C	A G	C T	A G
76	T T	G G	G G	C C	G G	T T	G G
77	T T	G G	G G	C C	A G	C T	G G
78	T T	G G	T T	A C	A G	T T	G G
79	T T	G G	G G	C C	A G	C T	G G
80	G T	A G	G T	C C	A A	T T	G G
81	T T	G G	G T	C C	A A	C T	G G
82	G T	G G	G T	C C	A G	C T	G G
83	T T	G G	G T	A C	A G	T T	G G
84	T T	G G	G G	C C	A G	T T	G G
85	T T	G G	G T	C C	G G	C T	G G
86	T T	G G	G T	A C	A G	T T	G G
87	G T	G G	G G	C C	G G	C T	A G
89	T T	G G	G T	C C	A G	T T	G G
90	G T	G G	G G	C C	G G	T T	G G
91	T T	G G	G G	C C	G G	T T	G G
92	T T	G G	G G	C C	A G	C C	G G
93	T T	G G	T T	C C	A A	T T	G G
94	T T	G G	T T	A A	A G	T T	G G
95	T T	G G	G G	C C	A G	C T	G G
96	T T	G G	T T	A A	A G	T T	G G
97	T T	G G	G T	C C	G G	T T	G G
100	T T	G G	G T	A C	A G	T T	G G
101	G T	G G	G T	C C	A G	T T	G G
102	T T	G G	G G	C C	G G	C T	G G
104	T T	G G	G G	C C	A G	C T	G G
107	G T	G G	G G	C C	A G	C T	G G
110	T T	G G	T T	C C	G G	T T	G G
115	T T	G G	G G	C C	G G	T T	G G
116	T T	G G	G G	C C	G G	T T	G G
118	G T	G G	T T	A C	A A	T T	G G
119	T T	G G	G G	C C	A G	T T	G G
123	G T	G G	G G	C C	A G	C T	A G
124	T T	G G	G G	C C	A A	T T	G G
126	G T	G G	T T	A C	G G	T T	G G
129	T T	G G	G T	A C	A G	C T	G G
132	T T	G G	G T	A C	A A	T T	G G
136	T T	G G	G T	C C	G G	C T	A G
138	T T	G G	G G	C C	A G	T T	G G
140	G T	G G	T T	A C	A G	T T	G G
142	T T	G G	G G	C C	G G	C T	G G
143	T T	G G	G T	A C	G G	C C	G G
144	T T	G G	G G	C C	G G	C T	G G
146	T T	G G	G G	C C	A G	C T	G G
147	T T	G G	G G	C C	A G	T T	G G
148	T T	G G	G G	C C	G G	C T	G G
149	T T	G G	G G	C C	G G	C T	A G
154	T T	G G	G G	C C	G G	C T	G G
155	G T	G G	G T	A C	G G	T T	G G
157	T T	G G	G G	C C	G G	T T	G G
158	T T	G G	G T	A C	A G	T T	G G
159	T T	G G	G G	C C	A G	C C	A A
160	T T	G G	G G	C C	G G	T T	G G
161	T T	G G	G G	C C	A G	T T	G G
162	T T	G G	G T	C C	A G	T T	G G
165	T T	G G	T T	C C	A G	C T	G G
167	T T	G G	G T	C C	G G	C T	G G
168	G T	G G	G T	A C	A G	T T	G G
169	T T	G G	G T	A C	A G	T T	G G
173	T T	G G	G G	C C	G G	C T	G G
174	T T	G G	G G	C C	G G	T T	G G
175	T T	G G	G G	C C	A G	T T	G G
176	T T	G G	G T	A C	A G	C T	G G
177	T T	G G	G T	A C	A G	T T	G G
178	T T	G G	G G	C C	A G	C T	G G
179	T T	G G	G T	C C	G G	C T	A G
181	T T	G G	G T	C C	G G	T T	G G
182	T T	G G	G G	C C	G G	T T	G G
183	T T	G G	G T	A C	G G	T T	G G
185	T T	G G	G G	C C	G G	T T	G G
190	T T	G G	G G	C C	G G	T T	G G
191	T T	G G	G G	C C	G G	C T	A G
192	T T	G G	G T	C C	A A	T T	G G
193	T T	G G	G T	A C	A A	C T	G G
194	T T	G G	G T	A C	G G	C T	A G
195	T T	G G	G G	C C	G G	C T	G G
196	T T	G G	G T	A C	G G	C T	A G
197	T T	G G	G G	C C	A G	T T	G G
198	T T	G G	G T	C C	A G	T T	G G
199	T T	G G	G T	A C	A G	T T	G G
200	T T	G G	G G	C C	A G	T T	G G
201	T T	G G	G G	C C	G G	C C	A A
202	T T	G G	G T	C C	A G	T T	G G
204	G T	G G	T T	A C	A G	C T	G G
205	T T	G G	G G	C C	G G	T T	G G
206	T T	G G	G G	C C	G G	C C	A G
207	T T	G G	G T	C C	A A	C T	G G
208	T T	G G	G T	A C	G G	T T	G G
209	T T	G G	G G	C C	A G	T T	G G
212	T T	G G	G G	C C	G G	C T	A G
214	T T	G G	G T	A C	A G	C T	A G
217	T T	G G	G G	C C	G G	T T	G G
219	T T	G G	G T	A C	A G	T T	G G
222	T T	G G	G G	C C	G G	C T	A G
223	T T	G G	G G	C C	G G	T T	G G
225	T T	G G	G T	A C	A G	T T	G G
226	T T	G G	G G	C C	A A	T T	G G
227	T T	G G	G G	C C	A G	T T	G G
228	T T	G G	G G	C C	G G	T T	G G
229	T T	G G	G T	C C	A G	T T	G G
232	T T	G G	T T	A C	A G	C T	G G
233	T T	G G	G G	C C	G G	T T	G G
234	G T	G G	G T	C C	A A	C T	G G
235	T T	G G	G T	A C	A G	C T	A G
236	T T	G G	G G	C C	A G	T T	G G
237	T T	G G	G T	A C	A A	T T	G G
238	T T	G G	G T	A C	A G	C T	G G
240	T T	G G	G G	C C	A G	T T	G G
241	T T	G G	G T	C C	G G	T T	G G
242	T T	G G	G T	C C	G G	T T	G G
243	T T	G G	T T	A A	G G	T T	G G
244	T T	G G	T T	A C	A G	C C	G G
245	T T	G G	T T	A C	A G	T T	G G
247	T T	G G	G T	A C	A G	T T	G G
249	T T	G G	T T	A C	A G	T T	G G
250	T T	G G	G T	C C	A G	T T	G G
251	T T	G G	T T	C C	A A	T T	G G
257	T T	G G	G T	A C	G G	T T	G G
258	T T	G G	G T	A C	G G	T T	G G
259	T T	G G	G G	C C	G G	T T	G G
260	T T	G G	T T	C C	A A	C T	G G
261	T T	G G	G G	C C	G G	T T	G G
262	T T	G G	G G	C C	G G	T T	G G
264	T T	G G	G G	C C	G G	C T	G G
265	T T	G G	G G	C C	A G	T T	G G
266	T T	G G	G G	C C	G G	T T	G G
267	T T	G G	G T	A C	G G	T T	G G
268	T T	G G	G G	C C	G G	T T	G G
269	T T	G G	G G	C C	G G	T T	G G
273	T T	G G	G G	C C	A G	C T	G G
276	T T	G G	G G	C C	A G	T T	G G
278	T T	G G	G G	C C	G G	C T	G G
280	T T	G G	G G	C C	A G	T T	G G
281	T T	G G	G G	C C	G G	T T	G G
282	T T	G G	G G	C C	G G	C T	G G
283	T T	G G	T T	C C	A A	T T	G G
286	T T	G G	G T	C C	A G	T T	G G
289	T T	G G	G T	C C	A G	T T	G G
290	T T	G G	G T	C C	A G	T T	G G
291	T T	G G	G T	A C	A G	C T	G G
292	T T	G G	G G	C C	G G	C T	A G
293	T T	G G	G T	A C	A G	C T	G G
297	T T	G G	G T	C C	A G	C T	A G
298	T T	G G	G G	C C	A G	C T	G G
301	T T	G G	G T	A C	A G	T T	G G
303	T T	G G	G G	C C	G G	T T	G G
313	G T	G G	G G	C C	G G	C T	G G
347	T T	G G	G T	A C	A G	T T	G G
352	T T	G G	G T	C C	A G	T T	G G
383	T T	G G	T T	A A	A G	T T	G G
385	T T	G G	G G	C C	G G	T T	A G
386	T T	G G	G T	A C	A G	C T	A G
387	T T	G G	G G	C C	G G	T T	G G
388	T T	G G	G T	C C	A G	T T	G G
390	T T	G G	G T	C C	A G	T T	G G
392	T T	G G	T T	C C	A G	C T	G G
393	T T	G G	G G	C C	G G	T T	G G
394	T T	G G	G G	C C	G G	T T	G G
395	T T	G G	G G	C C	G G	C T	G G
396	T T	G G	G T	A C	A G	C T	A G
397	T T	G G	G T	A C	A G	C T	A G
398	T T	G G	G T	C C	A G	C T	A G
403	T T	G G	G T	A C	G G	T T	G G
404	T T	G G	G T	A C	A G	C T	G G
410	T T	G G	T T	A A	A G	T T	G G
411	T T	G G	G G	C C	A G	T T	G G
412	T T	G G	G G	C C	A G	C T	G G
413	T T	G G	G G	C C	G G	T T	G G
414	T T	G G	G T	A C	A G	T T	G G
415	T T	G G	G T	C C	A G	C C	A G
416	T T	G G	G T	C C	A G	C T	A G
418	T T	G G	G T	C C	A G	C T	A G
420	T T	G G	G G	C C	A G	C T	A G
423	T T	G G	G T	C C	A G	C T	A G
425	T T	G G	G G	C C	A G	C T	A G
428	T T	G G	G G	C C	A G	C T	A G
430	T T	G G	G T	C C	A G	C T	G G
431	T T	G G	T T	A C	G G	T T	G G
433	T T	G G	G G	C C	A G	C C	A G
436	T T	G G	G G	C C	A G	C T	A G
440	T T	G G	G T	A C	A G	C T	A G
442	T T	G G	G G	C C	G G	T T	G G
443	T T	G G	G G	C C	A G	C C	A G
444	T T	G G	G G	C C	A G	C T	G G
445	T T	G G	G G	C C	G G	T T	G G
446	T T	G G	G T	C C	A G	T T	G G
449	T T	G G	G G	C C	G G	T T	G G
453	T T	G G	G G	C C	G G	C T	G G
454	T T	G G	G T	A C	A G	C T	A G
455	T T	G G	G T	C C	A G	C T	A G
456	T T	G G	G G	C C	G G	T T	A G
457	T T	G G	G G	C C	A G	C T	G G
458	T T	G G	G T	A C	A G	C T	G G
466	T T	G G	G T	A C	A G	C T	A G
467	T T	G G	G G	C C	A G	C T	G G
470	T T	G G	G G	C C	A G	C C	A G
471	T T	G G	G T	C C	A G	T T	G G
472	T T	G G	T T	A C	G G	C T	G G
473	T T	G G	G T	A C	A G	T T	G G
474	T T	G G	G T	C C	A A	T T	G G
475	T T	G G	G G	C C	G G	C T	G G
478	T T	G G	G G	C C	G G	T T	G G
479	T T	G G	G G	C C	A G	T T	G G
480	T T	G G	G G	C C	G G	T T	G G
484	T T	G G	G T	C C	A G	C T	A G
487	T T	G G	G T	C C	A G	T T	G G
488	T T	G G	G G	C C	G G	T T	G G
489	T T	G G	G G	C C	G G	T T	G G
491	T T	G G	G T	C C	G G	T T	G G
495	T T	G G	G T	A C	G G	T T	G G
498	T T	G G	G G	C C	G G	T T	G G
499	T T	G G	T T	A C	A A	T T	A G
501	T T	G G	G T	A C	A A	T T	G G
502	T T	G G	G G	C C	G G	T T	G G
504	T T	G G	G G	C C	G G	T T	G G
506	G T	G G	T T	C C	A A	C T	A G
509	T T	G G	G G	C C	G G	T T	G G
510	T T	G G	G T	A C	G G	T T	G G
511	T T	G G	G G	C C	A G	C T	G G
512	T T	G G	G T	C C	G G	T T	G G
513	T T	G G	G T	C C	A G	T T	G G
516	T T	G G	G G	C C	G G	T T	G G
517	T T	G G	G T	C C	A A	T T	G G
521	T T	G G	G G	C C	A G	T T	G G
522	T T	G G	G G	C C	A G	T T	G G
523	T T	G G	G G	C C	A G	T T	G G
525	T T	G G	G G	C C	A G	T T	G G
527	T T	G G	G G	C C	G G	T T	G G
528	T T	G G	G T	A C	A G	C T	A A
529	T T	G G	G T	C C	A G	C T	A G
530	T T	G G	G T	A C	G G	T T	G G
533	T T	G G	G G	C C	G G	C T	G G
534	T T	G G	G G	C C	A A	T T	G G
536	T T	G G	G G	C C	G G	T T	G G
537	T T	G G	G T	C C	A G	T T	G G
538	T T	G G	G G	C C	A G	T T	G G
543	T T	G G	G G	A C	A G	T T	G G
545	T T	G G	G T	C C	A G	T T	G G
548	T T	G G	G G	C C	A A	T T	G G
549	T T	A G	G G	C C	G G	T T	G G
552	T T	G G	G G	C C	G G	T T	G G
553	T T	G G	G T	A C	A G	C T	G G
554	T T	G G	G T	C C	A G	T T	G G
557	T T	G G	G G	C C	G G	C T	G G
558	T T	G G	G G	C C	G G	T T	G G
560	T T	G G	G G	A C	A G	T T	G G
561	T T	G G	G G	C C	A G	T T	G G
563	T T	G G	G T	C C	A G	T T	G G
564	T T	G G	G G	C C	A G	T T	G G
565	T T	G G	G G	C C	A G	T T	G G
567	T T	G G	G G	C C	G G	T T	G G
568	T T	G G	G G	C C	A G	T T	G G
570	T T	G G	G T	C C	A G	T T	G G
572	T T	G G	G G	C C	A G	C T	G G
573	T T	G G	G T	C C	G G	T T	G G
576	T T	G G	G G	C C	A G	T T	G G
577	T T	G G	G G	C C	G G	T T	G G
578	T T	G G	G G	C C	A A	C T	G G
579	T T	G G	G G	C C	G G	T T	G G
580	T T	G G	G G	C C	A G	T T	G G
583	T T	G G	G G	C C	G G	T T	G G
584	T T	G G	G G	C C	G G	T T	G G
585	T T	G G	G G	C C	G G	T T	G G
588	T T	G G	G G	C C	G G	T T	G G
594	T T	G G	G T	C C	A G	T T	G G
597	T T	G G	G T	A C	A A	T T	G G
600	T T	G G	G G	C C	G G	T T	G G
605	T T	G G	G G	C C	G G	C T	A G
606	T T	G G	G T	C C	G G	T T	G G
607	G T	G G	G T	C C	A G	T T	G G
608	T T	G G	G G	C C	A G	T T	G G
609	T T	G G	G T	A C	G G	T T	G G
611	T T	G G	G T	C C	A G	T T	G G
612	T T	G G	G T	A C	A G	T T	G G
613	T T	G G	G T	A C	A G	T T	G G
614	T T	G G	T T	A A	G G	T T	G G
615	G T	G G	G T	C C	A G	T T	G G
618	T T	G G	G T	A C	A G	T T	G G
619	T T	G G	G G	C C	G G	T T	G G
621	T T	G G	G G	C C	G G	T T	G G
622	T T	G G	G T	A C	A G	T T	G G
623	T T	G G	G T	C C	A G	C C	G G
624	T T	G G	G T	C C	A A	T T	G G
625	T T	G G	G T	A C	G G	T T	G G
626	T T	G G	G T	C C	A G	C T	G G
627	G T	G G	G T	A C	A G	T T	G G
628	G T	G G	G T	A C	A G	C T	G G
629	T T	G G	G G	C C	G G	T T	G G
630	T T	G G	G T	C C	A G	T T	G G
633	T T	G G	G G	C C	G G	C T	A G
637	T T	G G	G T	C C	G G	T T	G G
638	T T	G G	G T	A C	G G	C T	A G
639	T T	G G	G T	A C	G G	T T	G G
641	T T	G G	G T	A C	A G	T T	G G
642	T T	G G	G G	C C	G G	T T	G G
643	T T	G G	G G	C C	G G	C T	A G
644	T T	G G	G G	C C	A G	T T	G G
645	T T	G G	G G	C C	A G	T T	G G
647	T T	G G	G G	C C	A G	T T	G G
648	T T	G G	G G	C C	A G	T T	G G
651	T T	G G	G G	C C	A G	T T	G G
652	T T	G G	G G	C C	G G	C C	A G
653	T T	G G	G T	A C	A G	T T	G G
654	T T	G G	G G	C C	A G	T T	G G
655	T T	G G	G G	C C	A G	C T	G G
657	T T	G G	G G	C C	A G	T T	G G
658	T T	G G	G T	C C	G G	C T	G G
659	T T	G G	G G	C C	A G	C T	G G
660	T T	G G	G T	A C	A G	T T	G G
663	T T	G G	G T	C C	G G	C T	G G
664	T T	G G	G T	A C	A G	T T	G G
665	T T	G G	G G	C C	G G	T T	G G
667	T T	G G	G T	C C	A G	T T	G G
668	T T	G G	G G	C C	G G	T T	G G
669	T T	G G	T T	C C	G G	C T	G G
670	G T	A G	T T	A A	A A	C T	G G
671	T T	G G	G T	C C	G G	C T	G G
672	T T	G G	G G	C C	G G	T T	G G
673	T T	G G	G T	A C	A G	C T	A G
675	T T	G G	G G	C C	A G	T T	G G
676	T T	G G	G T	A C	A G	T T	G G
677	T T	G G	G T	C C	G G	T T	G G
678	T T	G G	G G	C C	A G	T T	G G
679	T T	G G	G G	C C	G G	T T	G G
680	T T	G G	G G	C C	G G	T T	G G
681	T T	G G	G G	C C	G G	T T	G G
682	T T	G G	G G	C C	G G	T T	G G
683	T T	G G	G G	C C	A G	C C	G G
684	T T	G G	T T	A A	A A	T T	G G
685	T T	G G	G G	C C	G G	T T	G G
686	T T	G G	G T	C C	G G	T T	G G
688	T T	G G	G T	C C	A A	T T	G G
689	T T	G G	G T	C C	A G	T T	G G
699	T T	G G	G T	C C	A G	T T	G G
700	T T	G G	G G	C C	A G	T T	G G
701	T T	G G	G G	C C	G G	T T	G G
703	T T	G G	G G	C C	G G	T T	G G
707	T T	G G	T T	A C	A G	T T	G G
709	T T	G G	G T	A C	A G	C T	G G
712	T T	G G	G T	C C	G G	T T	G G
729	T T	G G	G T	A C	A G	T T	G G
739	T T	G G	G G	C C	A G	T T	G G
740	G T	A G	T T	A C	A A	T T	G G
746	T T	G G	T T	C C	A A	T T	G G
751	T T	G G	G G	C C	A G	C C	A G
754	T T	G G	G T	C C	A G	T T	G G
755	T T	G G	T T	A C	A A	T T	G G
758	T T	G G	G G	C C	A G	C T	G G
762	T T	G G	T T	A C	A A	T T	G G
764	T T	G G	G G	C C	A G	T T	G G
769	T T	G G	G T	A C	A G	T T	G G
770	T T	G G	G T	A C	G G	T T	G G
772	T T	G G	G G	C C	G G	T T	G G
801	T T	G G	G G	C C	G G	T T	G G
802	T T	G G	T T	C C	A G	T T	G G
804	T T	G G	G T	A C	A G	T T	G G
805	T T	G G	G G	C C	G G	T T	G G
807	T T	G G	G T	A C	A G	C T	A G
808	T T	G G	G T	C C	A G	T T	G G
810	T T	G G	G T	A C	A G	T T	G G
811	G T	G G	G G	A A	G G	T T	G G
812	T T	G G	G G	C C	G G	C T	G G
813	T T	G G	G G	C C	G G	T T	G G
816	T T	G G	G G	C C	G G	T T	G G
818	T T	G G	G T	A C	A G	T T	G G
819	T T	G G	G T	A C	G G	C T	A G
820	T T	G G	G T	C C	A G	T T	G G
822	G G	A G	G T	C C	A G	C T	A G
824	T T	G G	G T	C C	A G	C T	G G
826	T T	G G	G T	A C	A G	C T	G G
827	T T	G G	G G	C C	G G	T T	G G
828	T T	G G	G G	C C	G G	C C	A A
829	T T	G G	G G	C C	G G	T T	G G
832	T T	G G	G T	A C	A G	T T	G G
833	T T	G G	T T	A A	A A	T T	G G
834	T T	G G	G T	C C	A G	T T	G G
835	T T	G G	G G	C C	G G	C T	A G
837	T T	G G	G G	C C	A G	T T	G G
838	T T	G G	G T	A C	A G	C T	G G
839	T T	G G	G G	C C	A G	T T	G G
843	T T	G G	G T	C C	A G	T T	G G
847	T T	G G	G T	C C	A G	T T	G G
849	T T	G G	G G	C C	A A	T T	G G
850	T T	G G	G G	C C	G G	T T	G G
852	T T	G G	G T	A C	A G	T T	G G
853	T T	G G	G T	A C	A G	T T	G G
854	T T	G G	G T	A C	A A	C T	G G
855	T T	G G	G G	C C	G G	C T	A G
857	T T	G G	G G	C C	G G	C T	A G
858	T T	G G	G T	A C	G G	C T	A G
859	T T	G G	T T	A A	A A	T T	G G
